# Supplementary material for: Ejection Fraction-Related Differences of Baseline Characteristics and Outcomes in Troponin-Positive Patients without Obstructive Coronary Artery Disease
Source: MDPI journal article supplement (doi:10.3390/jcm13102826), 2024-05-11
Supplement: s1 [file s1]

Table S1. ECG parameters.

| Variables                                                                                                        | All patients<br>n=254 | LVEF≥50<br>n=170 | LVEF 40-49%<br>n=31 | LVEF<40<br>n=53 | P<br>Value       |
|------------------------------------------------------------------------------------------------------------------|-----------------------|------------------|---------------------|-----------------|------------------|
| <b>ECG — no, (%)</b>                                                                                             |                       |                  |                     |                 |                  |
| ST elevation                                                                                                     | 39 (15.2)             | 31 (18.3)        | 2 (6.5)             | 7 (13.2)        | 0.166            |
| Inversed T-Waves                                                                                                 | 110 (42.8)            | 68 (40.7)        | 14 (46.7)           | 28 (53.9)       | 0.242            |
| <b>Echocardiography data, n (%)</b>                                                                              |                       |                  |                     |                 |                  |
| LVEF on admission (%),<br>median (IQR)                                                                           | 55 (42-60)            | 60 (55-65)       | 45 (40-46)          | 30 (23-35)      | <b>&lt;0.001</b> |
| LVEF at discharge (%),<br>median (IQR)                                                                           | 53 (38.3-60)          | 60 (56-65)       | 40.5 (34.8-50)      | 38 (27-50)      | <b>&lt;0.001</b> |
| Left ventricular hypertrophy                                                                                     | 64 (24.9)             | 34 (20.2)        | 6 (20)              | 25 (47.1)       | <b>&lt;0.001</b> |
| Tricuspid valve regurgitation                                                                                    | 69 (26.8)             | 39 (22.9)        | 9 (30)              | 21 (39.6)       | 0.055            |
| - mild                                                                                                           | 51 (19.8)             | 33 (19.4)        | 6 (20)              | 12 (22.6)       | 0.878            |
| - moderate                                                                                                       | 18 (7)                | 6 (3.5)          | 3 (10)              | 10 (18.8)       | <b>0.003</b>     |
| - severe                                                                                                         | 0 (0)                 | 0 (0)            | 0 (0)               | 0 (0)           |                  |
| Mitral valve regurgitation                                                                                       | 82 (31.9)             | 46 (27.1)        | 11 (36.7)           | 26 (49)         | <b>0.021</b>     |
| - mild                                                                                                           | 64 (24.9)             | 39 (22.9)        | 8 (26.7)            | 18 (34)         | 0.406            |
| - moderate                                                                                                       | 10 (3.9)              | 3 (1.8)          | 2 (6.7)             | 6 (11.3)        | <b>0.031</b>     |
| - severe                                                                                                         | 8 (3.1)               | 4 (2.4)          | 1 (3.3)             | 4 (.5)          | 0.488            |
| Aortic valve regurgitation                                                                                       | 35 (13.6)             | 24 (14.1)        | 5 (16.7)            | 7 (13.2)        | 0.783            |
| - mild                                                                                                           | 29 (11.3)             | 20 (11.8)        | 4 (13.3)            | 6 (11.3)        | 0.848            |
| - moderate                                                                                                       | 3 (1.2)               | 2 (1.2)          | 1 (3.3)             | 0 (0)           | 0.406            |
| - severe                                                                                                         | 3 (1.2)               | 2 (1.2)          | 0 (0)               | 2 (3.7)         | 0.750            |
| <b>p values for the comparison between groups LVEF, Ejection fraction; LVEF≥50, LVEF 40-49%, and LVEF&lt;40.</b> |                       |                  |                     |                 |                  |
